# Supplementary material for: A Network Medicine Approach for Drug Repurposing in Duchenne Muscular Dystrophy
Source: PubMed Central journal article supplement (PMC8069953; doi:10.3390/genes12040543), 2021-04-09
Supplement: genes-12-00543-s001.pdf [file genes-12-00543-s001.pdf]

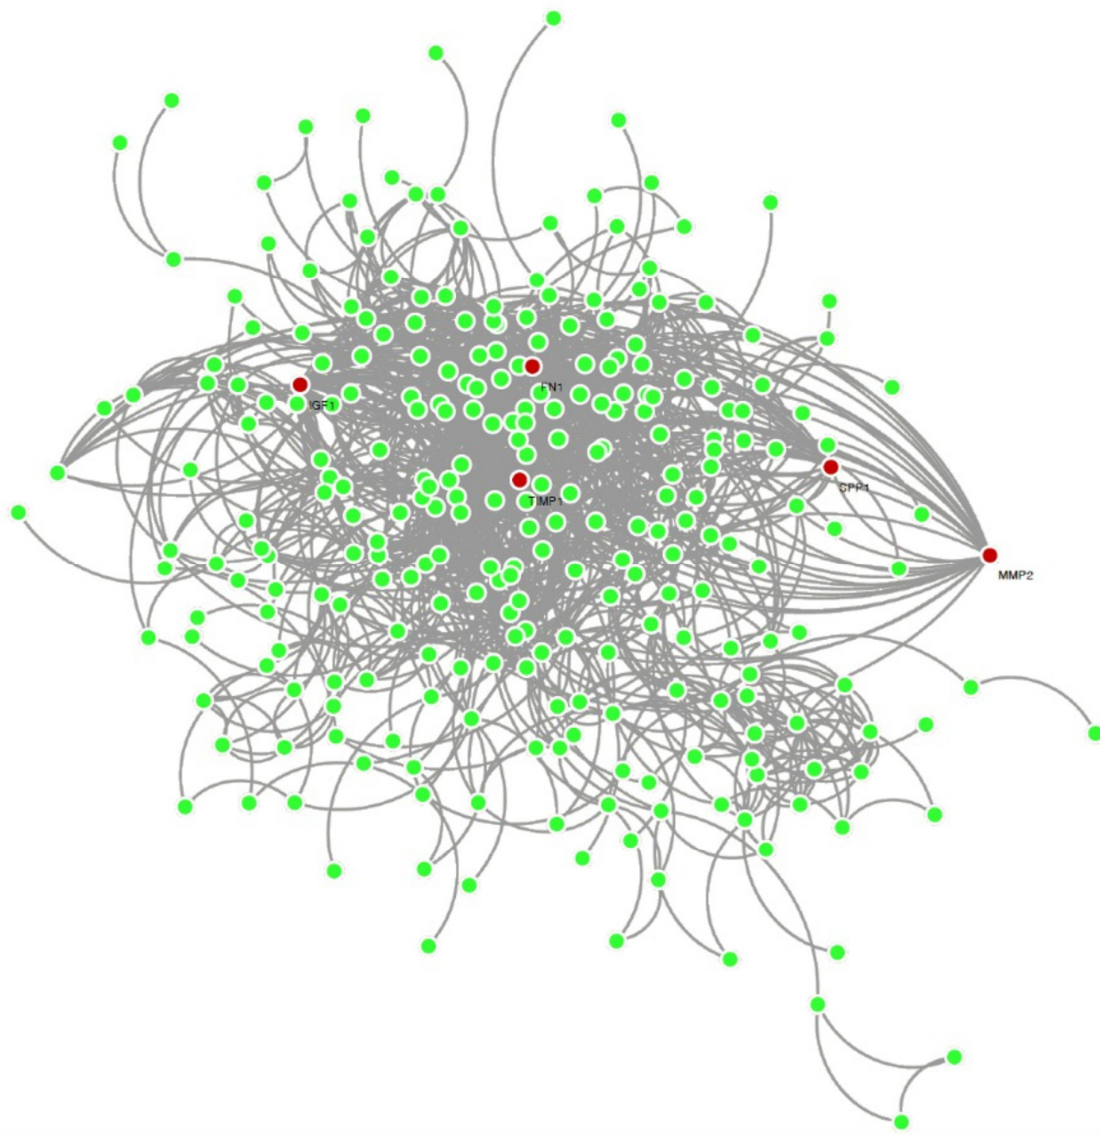

**Figure S1.** DMD module network. The network is formed by 260 genes from DisGeNET and 1101 interactions from STRING. Red nodes are the five seed candidate genes.

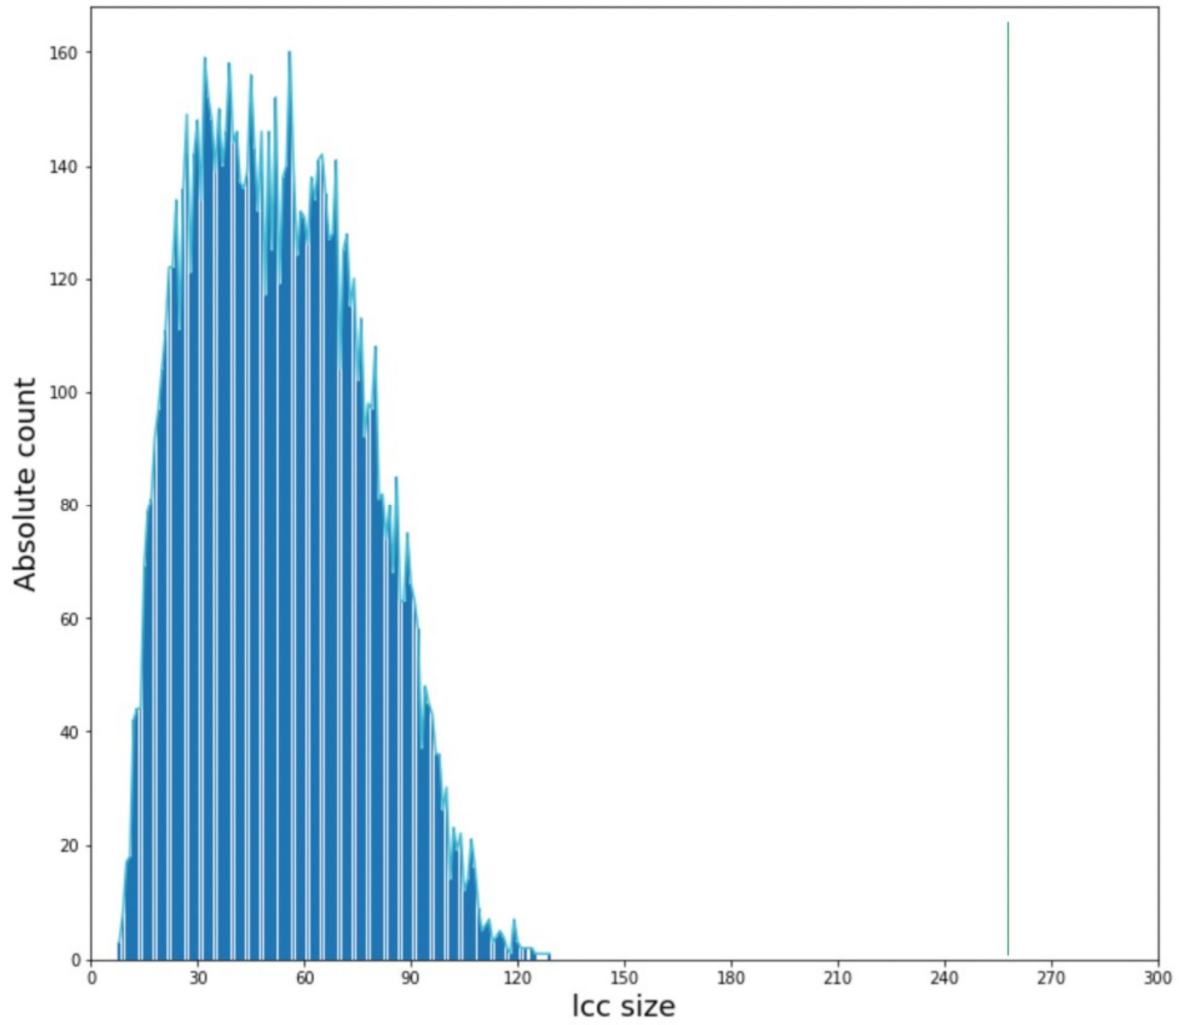

**Figure S2.** DMD module network is more connected than a random module of the same size. It is shown the distribution of the largest connected component of 10.000 random modules of the same size of the DMD module network. The green line ( $x=260$ ) represents the DMD largest connected component, obtaining a  $z$ -score=8.9.

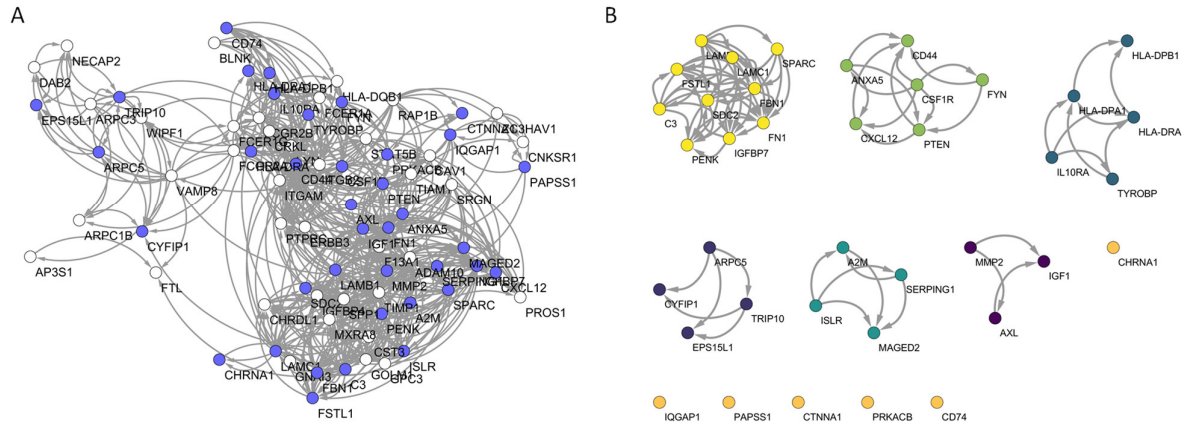

**Figure S3.** Shared genes between BMD and DMD signature. A) A meta-analysis of three microarray datasets (GSE3307, GSE13608 and GSE109178) was performed for the identification of differentially expressed genes (DEGs) in BMD muscle biopsies as compared to normal muscle biopsies. Briefly, the GSE13608 dataset included 6 samples of skeletal muscle biopsy from healthy people and 5 samples from BMD patients. Biopsies were taken from either biceps brachii, triceps brachii or deltoid. The GSE3307 dataset included 17 samples of skeletal muscle biopsy from healthy people and 10 samples from BMD patients. The GSE109178 dataset included 14 samples of controls and 11 samples from BMD patients. For both GSE3307 and GSE10917 datasets, biopsies were taken at the time of diagnosis and from the vastus lateralis. For the meta-analysis of GSE13608, GSE3307 and GSE109178, a random effects model of effect size measure was used to integrate gene expression patterns from the two datasets. Genes with an adjusted p value (FDR) < 0.05 and an |effect size| > 2 were identified as DEGs and selected for further analysis. A significant number of DEGs ( $p < 0.001$ ) were in common with the DMD signature genes (blue nodes), as determined by a hypergeometric test assessing the significance of the overlap between the BMD DEGs and the number of DMD signature genes B) MCODE analysis of the overlapping genes between BMD DEGs and DMD signature genes.

**Suppl. Table 1.** List of differentially expressed genes in DMD as determined by the meta-analysis of the GSE38417, GSE3307 and GSE6011 datasets.

| EntrezID | Name     | CombinedES | Pval |
|----------|----------|------------|------|
| 1072     | CFL1     | 2.638      | 0    |
| 6282     | S100A11  | 3.1412     | 0    |
| 975      | CD81     | 2.9806     | 0    |
| 6281     | S100A10  | 3.4436     | 0    |
| 3115     | HLA-DPB1 | 2.8816     | 0    |
| 302      | ANXA2    | 4.2067     | 0    |
| 7805     | LAPTM5   | 3.6247     | 0    |
| 8673     | VAMP8    | 2.9953     | 0    |
| 713      | C1QB     | 2.6594     | 0    |
| 6275     | S100A4   | 3.8619     | 0    |
| 2014     | EMP3     | 3.0342     | 0    |
| 1756     | DMD      | -2.9074    | 0    |
| 4129     | MAOB     | -3.2433    | 0    |
| 23166    | STAB1    | 3.2344     | 0    |
| 6123     | RPL3L    | -2.6272    | 0    |
| 5207     | PFKFB1   | -2.8532    | 0    |
| 10916    | MAGED2   | 3.0779     | 0    |
| 716      | C1S      | 3.3305     | 0    |
| 483      | ATP1B3   | 3.1909     | 0    |
| 3958     | LGALS3   | 2.9697     | 0    |
| 84617    | TUBB6    | 4.0407     | 0    |
| 84790    | TUBA1C   | 3.1103     | 0    |
| 5478     | PPIA     | 3.6242     | 0    |
| 3113     | HLA-DPA1 | 2.9842     | 0    |
| 2512     | FTL      | 3.3021     | 0    |
| 26986    | PABPC1   | 3.024      | 0    |
| 8635     | RNASET2  | 3.5856     | 0    |
| 712      | C1QA     | 3.6703     | 0    |

|       |          |         |            |
|-------|----------|---------|------------|
| 10763 | NES      | 3.4116  | 0          |
| 28959 | TMEM176B | 3.5987  | 0          |
| 2896  | GRN      | 2.5825  | 8.1567E-14 |
| 2806  | GOT2     | -2.5331 | 8.1567E-14 |
| 5255  | PHKA1    | -2.5052 | 1.4501E-13 |
| 7351  | UCP2     | 2.9441  | 1.4501E-13 |
| 4125  | MAN2B1   | 2.5018  | 1.4501E-13 |
| 23175 | LPIN1    | -2.4784 | 1.4501E-13 |
| 26509 | MYOF     | 3.3517  | 2.0606E-13 |
| 2     | A2M      | 2.4783  | 2.0606E-13 |
| 301   | ANXA1    | 2.4327  | 2.6771E-13 |
| 754   | PTTG1IP  | 2.4189  | 4.5677E-13 |
| 929   | CD14     | 3.3914  | 4.9717E-13 |
| 4069  | LYZ      | 2.414   | 4.9717E-13 |
| 4635  | MYL4     | 2.3894  | 6.0701E-13 |
| 3108  | HLA-DMA  | 3.0577  | 7.1185E-13 |
| 11167 | FSTL1    | 2.3913  | 7.5404E-13 |
| 3689  | ITGB2    | 2.3645  | 8.3302E-13 |
| 5837  | PYGM     | -2.3712 | 8.3302E-13 |
| 2350  | FOLR2    | 2.3634  | 9.0556E-13 |
| 4191  | MDH2     | -2.3547 | 9.0556E-13 |
| 53405 | CLIC5    | -2.3036 | 1.9837E-12 |
| 5236  | PGM1     | -2.2607 | 3.6337E-12 |
| 5176  | SERPINF1 | 2.6884  | 3.7646E-12 |
| 102   | ADAM10   | 2.2241  | 6.5992E-12 |
| 3728  | JUP      | -2.2153 | 7.5404E-12 |
| 103   | ADAR     | 2.2042  | 7.9253E-12 |
| 6261  | RYR1     | -2.2073 | 8.2965E-12 |
| 307   | ANXA4    | 2.2084  | 1.0441E-11 |
| 38    | ACAT1    | -2.1693 | 1.7191E-11 |
| 558   | AXL      | 2.1538  | 1.92E-11   |

|        |          |         |             |
|--------|----------|---------|-------------|
| 7416   | VDAC1    | -2.9861 | 2.1273E-11  |
| 10579  | TACC2    | -2.6729 | 2.3491E-11  |
| 633    | BGN      | 2.1371  | 2.4207E-11  |
| 3119   | HLA-DQB1 | 2.1338  | 2.7676E-11  |
| 83442  | SH3BGRL3 | 2.1541  | 3.226E-11   |
| 826    | CAPNS1   | 2.1134  | 4.0734E-11  |
| 1508   | CTSB     | 2.0997  | 4.0734E-11  |
| 9927   | MFN2     | -2.2507 | 4.8969E-11  |
| 56941  | HMCES    | -2.0821 | 5.1665E-11  |
| 55037  | PTCD3    | -2.0709 | 7.0322E-11  |
| 5164   | PDK2     | -2.0463 | 8.5724E-11  |
| 3055   | HCK      | 2.0552  | 8.9039E-11  |
| 5144   | PDE4D    | -2.0433 | 1.0709E-10  |
| 4684   | NCAM1    | 2.0401  | 1.0818E-10  |
| 83700  | JAM3     | 2.9123  | 1.0818E-10  |
| 5552   | SRGN     | 2.0239  | 1.1624E-10  |
| 1975   | EIF4B    | -2.0233 | 1.2872E-10  |
| 1725   | DHPS     | -2.0175 | 1.3976E-10  |
| 11031  | RAB31    | 3.7843  | 1.5186E-10  |
| 10133  | OPTN     | -2.5662 | 1.8355E-10  |
| 1462   | VCAN     | 3.4871  | 2.1581E-10  |
| 4478   | MSN      | 2.1058  | 3.8994E-10  |
| 23171  | GPD1L    | -2.9455 | 4.144E-10   |
| 140461 | ASB8     | -2.1172 | 0.000000001 |
| 9961   | MVP      | 2.6771  | 0.000000001 |
| 1436   | CSF1R    | 3.5282  | 1.061E-09   |
| 10475  | TRIM38   | 2.6186  | 1.1889E-09  |
| 715    | C1R      | 4.1449  | 1.3153E-09  |
| 51303  | FKBP11   | 3.2183  | 1.8451E-09  |
| 4608   | MYBPH    | 2.7266  | 1.8637E-09  |
| 60     | ACTB     | 2.804   | 4.418E-09   |

|        |         |         |             |
|--------|---------|---------|-------------|
| 972    | CD74    | 3.1564  | 5.6554E-09  |
| 10581  | IFITM2  | 2.7676  | 1.1143E-08  |
| 25900  | IFFO1   | 2.4344  | 1.4398E-08  |
| 10410  | IFITM3  | 2.7059  | 1.5056E-08  |
| 103910 | MYL12B  | 2.1665  | 1.6471E-08  |
| 7162   | TPBG    | 2.7137  | 1.7452E-08  |
| 10409  | BASP1   | 2.3413  | 1.9871E-08  |
| 7305   | TYROBP  | 4.0016  | 2.3284E-08  |
| 967    | CD63    | 3.2678  | 2.6389E-08  |
| 3122   | HLA-DRA | 3.9545  | 3.1334E-08  |
| 3487   | IGFBP4  | 2.0655  | 4.4073E-08  |
| 9093   | DNAJA3  | -2.3413 | 4.9241E-08  |
| 203068 | TUBB    | 2.8053  | 0.000000062 |
| 150    | ADRA2A  | 2.3073  | 6.637E-08   |
| 1009   | CDH11   | 2.2569  | 0.000000068 |
| 477    | ATP1A2  | -2.3278 | 9.8512E-08  |
| 4256   | MGP     | 2.9497  | 1.0728E-07  |
| 8407   | TAGLN2  | 2.2887  | 1.0789E-07  |
| 2006   | ELN     | 2.4596  | 1.1676E-07  |
| 9322   | TRIP10  | -2.8064 | 1.3088E-07  |
| 818    | CAMK2G  | -2.3523 | 1.8483E-07  |
| 23643  | LY96    | 3.5457  | 0.000000208 |
| 29995  | LMCD1   | -2.0013 | 2.3707E-07  |
| 10577  | NPC2    | 3.8126  | 3.205E-07   |
| 4689   | NCF4    | 2.3732  | 3.2277E-07  |
| 5912   | RAP2B   | 3.1832  | 3.2683E-07  |
| 2202   | EFEMP1  | 2.3358  | 3.624E-07   |
| 4267   | CD99    | 3.8114  | 3.8185E-07  |
| 5886   | RAD23A  | -3.6719 | 3.8513E-07  |
| 54587  | MXRA8   | 2.2948  | 4.8183E-07  |
| 2987   | GUK1    | 2.0042  | 5.0311E-07  |

|       |          |         |             |
|-------|----------|---------|-------------|
| 5538  | PPT1     | 2.8963  | 0.000000641 |
| 7431  | VIM      | 3.1855  | 6.9689E-07  |
| 6284  | S100A13  | 2.2316  | 7.3366E-07  |
| 5502  | PPP1R1A  | -2.2662 | 8.3343E-07  |
| 5156  | PDGFRA   | 2.0373  | 8.6264E-07  |
| 419   | ART3     | -2.1366 | 9.4508E-07  |
| 6039  | RNASE6   | 3.393   | 1.4395E-06  |
| 5660  | PSAP     | 2.2499  | 1.7211E-06  |
| 70    | ACTC1    | 4.144   | 2.3342E-06  |
| 3206  | HOXA10   | -2.0435 | 2.7449E-06  |
| 7076  | TIMP1    | 3.5344  | 0.00003021  |
| 1192  | CLIC1    | 3.8753  | 3.1102E-06  |
| 710   | SERPING1 | 3.1772  | 0.00003323  |
| 56944 | OLFML3   | 2.2987  | 0.00003323  |
| 10457 | GPNMB    | 3.51    | 3.3954E-06  |
| 341   | APOC1    | 2.2033  | 3.4579E-06  |
| 5328  | PLAU     | 2.4323  | 3.9242E-06  |
| 5532  | PPP3CB   | -2.4821 | 4.0896E-06  |
| 10234 | LRRC17   | 3.929   | 5.0968E-06  |
| 27190 | IL17B    | 2.2929  | 5.1213E-06  |
| 6945  | MLX      | -2.71   | 5.9442E-06  |
| 7045  | TGFBI    | 2.6102  | 5.9734E-06  |
| 304   | ANXA2P2  | 3.4362  | 6.0011E-06  |
| 217   | ALDH2    | -2.4336 | 6.2925E-06  |
| 4016  | LOXL1    | 2.2003  | 7.4071E-06  |
| 23191 | CYFIP1   | 2.5736  | 8.0083E-06  |
| 7572  | ZNF24    | -2.319  | 8.3734E-06  |
| 4137  | MAPT     | -2.5669 | 9.4112E-06  |
| 292   | SLC25A5  | 2.9869  | 9.8404E-06  |
| 4621  | MYH3     | 4.8764  | 0.000010045 |
| 2217  | FCGRT    | 2.6275  | 0.000010063 |



|       |          |         |             |
|-------|----------|---------|-------------|
| 4681  | NBL1     | 2.1551  | 0.000010363 |
| 55707 | NECAP2   | 2.0162  | 0.0000122   |
| 2275  | FHL3     | -2.7452 | 0.000012223 |
| 6386  | SDCBP    | 2.6624  | 0.000012345 |
| 6748  | SSR4     | 3.6335  | 0.000012345 |
| 2805  | GOT1     | -2.2663 | 0.000012345 |
| 3074  | HEXB     | 2.1771  | 0.000012642 |
| 397   | ARHGDIB  | 2.0579  | 0.000014305 |
| 2162  | F13A1    | 2.4647  | 0.000018004 |
| 51375 | SNX7     | 2.4528  | 0.000018154 |
| 2923  | PDIA3    | 2.2143  | 0.000018773 |
| 25937 | WWTR1    | 3.1227  | 0.000019932 |
| 54504 | CPVL     | 2.5661  | 0.000028686 |
| 308   | ANXA5    | 3.4738  | 0.000029847 |
| 10327 | AKR1A1   | 2.22    | 0.000030207 |
| 64747 | MFSD1    | 3.0797  | 0.00003029  |
| 6175  | RPLP0    | 2.592   | 0.000032154 |
| 10095 | ARPC1B   | 2.8596  | 0.000032401 |
| 7188  | TRAF5    | 2.124   | 0.000033015 |
| 10079 | ATP9A    | 2.4104  | 0.000039406 |
| 1339  | COX6A2   | -2.7042 | 0.000049366 |
| 27242 | TNFRSF21 | 2.644   | 0.000049969 |
| 64231 | MS4A6A   | 3.8055  | 0.000050739 |
| 7048  | TGFBR2   | 3.0782  | 0.000054357 |
| 58526 | MID1IP1  | -2.2101 | 0.000055877 |
| 3150  | HMGN1    | 3.4279  | 0.000056744 |
| 5359  | PLSCR1   | 2.5122  | 0.000058082 |
| 845   | CASQ2    | 2.6354  | 0.000060833 |
| 58494 | JAM2     | 3.1042  | 0.000060833 |
| 7779  | SLC30A1  | 2.0806  | 0.0000647   |
| 3416  | IDE      | -2.3998 | 0.000066367 |

|       |         |         |             |
|-------|---------|---------|-------------|
| 2542  | SLC37A4 | -2.0382 | 0.000068554 |
| 7957  | EPM2A   | -3.4588 | 0.000070308 |
| 214   | ALCAM   | 2.1827  | 0.000070958 |
| 10487 | CAP1    | 2.6769  | 0.000072765 |
| 25813 | SAMM50  | -2.9978 | 0.000078795 |
| 22919 | MAPRE1  | 2.4596  | 0.00007902  |
| 9056  | SLC7A7  | 2.6294  | 0.000080897 |
| 8655  | DYNLL1  | 3.0503  | 0.000081779 |
| 1634  | DCN     | 3.4286  | 0.000086752 |
| 9332  | CD163   | 3.1751  | 0.000090462 |
| 5479  | PPIB    | 2.7426  | 0.000090688 |
| 5588  | PRKCQ   | -2.4549 | 0.000091772 |
| 1075  | CTSC    | 2.3756  | 0.000098459 |
| 51642 | MRPL48  | -2.4435 | 0.00011171  |
| 8826  | IQGAP1  | 2.0718  | 0.00011238  |
| 476   | ATP1A1  | 2.4383  | 0.00011464  |
| 4155  | MBP     | -2.7208 | 0.0001202   |
| 5641  | LGMN    | 4.2232  | 0.00015136  |
| 11326 | VSIG4   | 2.4684  | 0.00015721  |
| 10840 | ALDH1L1 | -3.2236 | 0.00015839  |
| 4360  | MRC1    | 3.284   | 0.00015972  |
| 10105 | PPIF    | -2.1421 | 0.00016533  |
| 6277  | S100A6  | 2.8752  | 0.00017217  |
| 7320  | UBE2B   | -2.9346 | 0.00017452  |
| 50717 | DCAF8   | -2.2226 | 0.00017781  |
| 5796  | PTPRK   | 2.1311  | 0.00018197  |
| 55222 | LRRC20  | -2.5661 | 0.00018331  |
| 5627  | PROS1   | 3.5387  | 0.00018532  |
| 4637  | MYL6    | 2.5251  | 0.00020287  |
| 4330  | MN1     | -3.9479 | 0.00021962  |
| 10376 | TUBA1B  | 4.5411  | 0.00022873  |

|       |          |         |            |
|-------|----------|---------|------------|
| 293   | SLC25A6  | 2.8711  | 0.00022906 |
| 6122  | RPL3     | 4.176   | 0.00025146 |
| 55365 | TMEM176A | 2.2511  | 0.00025542 |
| 4013  | VWA5A    | 2.608   | 0.00025567 |
| 81855 | SFXN3    | 2.3685  | 0.00026175 |
| 5270  | SERPINE2 | 2.7434  | 0.00026465 |
| 7846  | TUBA1A   | 4.4543  | 0.00026943 |
| 64581 | CLEC7A   | 2.0502  | 0.0002842  |
| 4046  | LSP1     | 2.7933  | 0.00030521 |
| 8406  | SRPX     | 3.6171  | 0.00030652 |
| 719   | C3AR1    | 2.1411  | 0.00031089 |
| 23139 | MAST2    | -2.0435 | 0.00031099 |
| 6303  | SAT1     | 3.3773  | 0.00032392 |
| 5223  | PGAM1    | 3.0215  | 0.00032862 |
| 3838  | KPNA2    | 2.3863  | 0.00037545 |
| 960   | CD44     | 4.079   | 0.00037565 |
| 10217 | CTDSPL   | 2.3086  | 0.00037574 |
| 51063 | CALHM2   | 3.5929  | 0.00038565 |
| 473   | RERE     | -2.1051 | 0.00038958 |
| 3428  | IFI16    | 3.7431  | 0.00041143 |
| 25932 | CLIC4    | 2.6421  | 0.00041172 |
| 54918 | CMTM6    | 2.9047  | 0.00043675 |
| 5355  | PLP2     | 2.3694  | 0.00047428 |
| 11014 | KDEL2    | 2.4609  | 0.00049117 |
| 2200  | FBN1     | 2.5827  | 0.00049458 |
| 10939 | AFG3L2   | -2.4448 | 0.00050492 |
| 3431  | SP110    | 2.1839  | 0.000511   |
| 60685 | ZFAND3   | -2.2485 | 0.00051591 |
| 55239 | OGFOD1   | -2.217  | 0.00052199 |
| 2023  | ENO1     | 2.6531  | 0.00053624 |
| 4282  | MIF      | 4.0647  | 0.00053624 |

|        |          |         |            |
|--------|----------|---------|------------|
| 1915   | EEF1A1   | 4.9139  | 0.00053867 |
| 23358  | USP24    | -2.0061 | 0.00054433 |
| 8396   | PIP4K2B  | -2.2593 | 0.00055025 |
| 55208  | DCUN1D2  | -2.8793 | 0.00055297 |
| 6304   | SATB1    | -2.0019 | 0.0005579  |
| 3105   | HLA-A    | 2.7895  | 0.00058137 |
| 64761  | PARP12   | 2.0906  | 0.00059757 |
| 57157  | PHTF2    | -2.4185 | 0.00060415 |
| 5547   | PRCP     | 2.4651  | 0.00061154 |
| 622    | BDH1     | -2.0577 | 0.00062495 |
| 55577  | NAGK     | 2.6463  | 0.00063573 |
| 4626   | MYH8     | 6.1206  | 0.00065286 |
| 3988   | LIPA     | 2.7859  | 0.00065346 |
| 6324   | SCN1B    | -4.0275 | 0.00065389 |
| 3177   | SLC29A2  | -2.5452 | 0.00066672 |
| 5774   | PTPN3    | -2.8878 | 0.00068529 |
| 718    | C3       | 3.5092  | 0.00073127 |
| 994    | CDC25B   | 2.6087  | 0.00073943 |
| 1397   | CRIP2    | 2.7776  | 0.00075346 |
| 5118   | PCOLCE   | 4.3843  | 0.00079846 |
| 10256  | CNKSR1   | -2.0712 | 0.00080474 |
| 4060   | LUM      | 4.3237  | 0.00080683 |
| 5757   | PTMA     | 2.4923  | 0.00081401 |
| 6222   | RPS18    | 2.3197  | 0.0008408  |
| 3959   | LGALS3BP | 3.9413  | 0.00084419 |
| 8483   | CILP     | 3.373   | 0.0008468  |
| 5360   | PLTP     | 3.1142  | 0.00090108 |
| 114876 | OSBPL1A  | -2.2047 | 0.00090108 |
| 7139   | TNNT2    | 3.3974  | 0.00091171 |
| 7456   | WIPF1    | 3.0692  | 0.00092058 |
| 3490   | IGFBP7   | 2.9953  | 0.00093531 |

|        |         |         |            |
|--------|---------|---------|------------|
| 29109  | FHOD1   | -2.6169 | 0.00093531 |
| 10486  | CAP2    | -2.6867 | 0.0010116  |
| 6387   | CXCL12  | 3.9028  | 0.0010315  |
| 3106   | HLA-B   | 2.5766  | 0.0010528  |
| 961    | CD47    | 2.4201  | 0.0010582  |
| 3394   | IRF8    | 2.6877  | 0.0010791  |
| 3587   | IL10RA  | 2.7956  | 0.0010886  |
| 54829  | ASPN    | 4.0681  | 0.0010886  |
| 113146 | AHNAK2  | 2.6128  | 0.0011081  |
| 1292   | COL6A2  | 3.2329  | 0.0011141  |
| 6258   | RXRG    | -2.698  | 0.0011303  |
| 894    | CCND2   | 2.9859  | 0.0011422  |
| 2532   | ACKR1   | 2.332   | 0.0011449  |
| 108    | ADCY2   | -2.9495 | 0.0011554  |
| 63935  | PCIF1   | -2.1473 | 0.0011554  |
| 4218   | RAB8A   | 2.2325  | 0.0011713  |
| 760    | CA2     | -2.6529 | 0.0012484  |
| 5608   | MAP2K6  | -2.138  | 0.0012918  |
| 9590   | AKAP12  | 2.0736  | 0.0012929  |
| 567    | B2M     | 2.8175  | 0.0013138  |
| 25878  | MXRA5   | 3.477   | 0.0013469  |
| 10092  | ARPC5   | 3.2685  | 0.0013557  |
| 9909   | DENND4B | -2.0838 | 0.001432   |
| 7942   | TFEB    | -2.2398 | 0.0014412  |
| 2207   | FCER1G  | 2.4557  | 0.0014427  |
| 5728   | PTEN    | 2.061   | 0.0014606  |
| 10418  | SPON1   | 2.1339  | 0.001484   |
| 2212   | FCGR2A  | 2.2393  | 0.0015018  |
| 25816  | TNFAIP8 | 2.8695  | 0.0015298  |
| 11124  | FAF1    | -3.2751 | 0.0016223  |
| 7422   | VEGFA   | -2.0426 | 0.0016801  |

|       |         |         |           |
|-------|---------|---------|-----------|
| 4067  | LYN     | 2.4569  | 0.0017165 |
| 29108 | PYCARD  | 3.0943  | 0.0017165 |
| 1952  | CELSR2  | -2.4417 | 0.0017183 |
| 5654  | HTRA1   | 4.0039  | 0.0017224 |
| 1855  | DVL1    | -2.5856 | 0.0017251 |
| 3275  | PRMT2   | 2.7103  | 0.0017558 |
| 1475  | CSTA    | 2.1659  | 0.0017558 |
| 9168  | TMSB10  | 4.8624  | 0.0017558 |
| 55244 | SLC47A1 | -2.635  | 0.0017558 |
| 1718  | DHCR24  | -2.3732 | 0.0017707 |
| 10788 | IQGAP2  | 2.7692  | 0.0018418 |
| 115   | ADCY9   | -2.5071 | 0.0018584 |
| 10346 | TRIM22  | 2.3447  | 0.0019099 |
| 79630 | C1orf54 | 2.1355  | 0.0019668 |
| 6672  | SP100   | 2.3953  | 0.0019717 |
| 30844 | EHD4    | 2.06    | 0.0020182 |
| 25903 | OLFML2B | 4.0959  | 0.0020595 |
| 5997  | RGS2    | 2.9318  | 0.0020725 |
| 51296 | SLC15A3 | 2.1152  | 0.0020725 |
| 2059  | EPS8    | 2.39    | 0.0021297 |
| 3075  | CFH     | 2.6224  | 0.0021444 |
| 55803 | ADAP2   | 2.6256  | 0.0021851 |
| 23471 | TRAM1   | 2.6496  | 0.0021928 |
| 5244  | ABCB4   | -2.8432 | 0.0022048 |
| 9689  | BZW1    | 2.3245  | 0.0022113 |
| 51338 | MS4A4A  | 3.272   | 0.0022299 |
| 6696  | SPP1    | 2.6665  | 0.0022341 |
| 7280  | TUBB2A  | 2.7173  | 0.0022384 |
| 79188 | TMEM43  | 2.2156  | 0.002289  |
| 827   | CAPN6   | 3.533   | 0.0023598 |
| 5179  | PENK    | 2.89    | 0.0023609 |

|       |         |         |           |
|-------|---------|---------|-----------|
| 9741  | LAPTM4A | 2.897   | 0.0025059 |
| 10404 | CPQ     | 2.8336  | 0.0025357 |
| 23585 | TMEM50A | 2.6564  | 0.002538  |
| 822   | CAPG    | 2.0186  | 0.0025447 |
| 56270 | WDR45B  | 2.2622  | 0.0025679 |
| 5320  | PLA2G2A | 2.6311  | 0.002604  |
| 9581  | PREPL   | 2.7684  | 0.002624  |
| 23078 | VWA8    | -2.8562 | 0.0027432 |
| 3840  | KPNA4   | -2.4801 | 0.0027833 |
| 4209  | MEF2D   | -2.3028 | 0.0028261 |
| 7412  | VCAM1   | 4.018   | 0.0028394 |
| 1026  | CDKN1A  | 2.3335  | 0.0028474 |
| 5025  | P2RX4   | 2.0893  | 0.0028952 |
| 9111  | NMI     | 2.5118  | 0.0029018 |
| 6664  | SOX11   | 2.1407  | 0.0029315 |
| 6383  | SDC2    | 2.2067  | 0.0029345 |
| 9246  | UBE2L6  | 2.105   | 0.003047  |
| 10723 | SLC12A7 | 2.5851  | 0.0030868 |
| 2335  | FN1     | 2.1226  | 0.0031101 |
| 23129 | PLXND1  | 2.2007  | 0.0031859 |
| 1786  | DNMT1   | 2.0901  | 0.0032067 |
| 11010 | GLIPR1  | 2.0208  | 0.0032225 |
| 2773  | GNAI3   | 2.5202  | 0.0032418 |
| 1293  | COL6A3  | 5.1452  | 0.0032466 |
| 55615 | PRR5    | 2.719   | 0.003279  |
| 81035 | COLEC12 | 3.9143  | 0.0033259 |
| 1352  | COX10   | -2.6526 | 0.003337  |
| 4636  | MYL5    | 4.0223  | 0.0033953 |
| 3176  | HNMT    | 3.3898  | 0.0034315 |
| 4869  | NPM1    | 2.7684  | 0.0035569 |
| 10777 | ARPP21  | 2.0764  | 0.0035655 |

|       |            |         |           |
|-------|------------|---------|-----------|
| 79589 | RNF128     | -2.5892 | 0.0035674 |
| 3133  | HLA-E      | 2.4209  | 0.0036304 |
| 5445  | PON2       | 2.7415  | 0.0036327 |
| 57017 | COQ9       | -2.3285 | 0.0037105 |
| 2012  | EMP1       | 2.1149  | 0.0038588 |
| 9817  | KEAP1      | -2.3713 | 0.0040622 |
| 8519  | IFITM1     | 2.3102  | 0.0041518 |
| 55790 | CSGALNACT1 | 2.2967  | 0.0042023 |
| 4313  | MMP2       | 3.3968  | 0.0042548 |
| 7070  | THY1       | 3.1268  | 0.0042548 |
| 80896 | NPL        | 2.1214  | 0.0042548 |
| 2872  | MKNK2      | -2.8321 | 0.0042562 |
| 64092 | SAMSN1     | 2.2654  | 0.0043486 |
| 55827 | DCAF6      | -2.4933 | 0.0043621 |
| 9500  | MAGED1     | 2.003   | 0.004419  |
| 10384 | BTN3A3     | 2.2283  | 0.0045682 |
| 2766  | GMPR       | -2.6874 | 0.0047129 |
| 51204 | TACO1      | -2.0416 | 0.0047371 |
| 3839  | KPNA3      | -2.6457 | 0.0047473 |
| 10051 | SMC4       | 2.2712  | 0.0047603 |
| 5827  | PXMP2      | -2.2643 | 0.0048975 |
| 7107  | GPR137B    | 3.7129  | 0.0049259 |
| 8878  | SQSTM1     | -2.7128 | 0.0049433 |
| 8604  | SLC25A12   | -2.6297 | 0.0049863 |
| 3426  | CFI        | 3.2806  | 0.0049903 |
| 6097  | RORC       | -2.3527 | 0.0049999 |
| 2124  | EVI2B      | 2.2641  | 0.0050227 |
| 23277 | CLUH       | -2.3843 | 0.0050963 |
| 3796  | KIF2A      | 2.1441  | 0.0051851 |
| 30008 | EFEMP2     | 2.0656  | 0.005218  |
| 1520  | CTSS       | 3.0459  | 0.0052492 |



|       |         |         |           |
|-------|---------|---------|-----------|
| 4853  | NOTCH2  | 3.5845  | 0.0052796 |
| 3109  | HLA-DMB | 2.3699  | 0.0052796 |
| 27075 | TSPAN13 | 2.6237  | 0.0052796 |
| 51668 | HSPB11  | 2.2453  | 0.0053049 |
| 2192  | FBLN1   | 2.0268  | 0.0053432 |
| 4121  | MAN1A1  | 3.0197  | 0.0053667 |
| 4239  | MFAP4   | 2.1746  | 0.0053887 |
| 3684  | ITGAM   | 2.558   | 0.0054207 |
| 3671  | ISLR    | 2.5491  | 0.0054477 |
| 1266  | CNN3    | 2.6107  | 0.0054803 |
| 7991  | TUSC3   | 2.7406  | 0.0054803 |
| 3927  | LASP1   | 3.1551  | 0.0054917 |
| 1134  | CHRNA1  | 4.2218  | 0.0056872 |
| 1399  | CRKL    | -2.1813 | 0.0057998 |
| 8897  | MTMR3   | -2.0542 | 0.0058182 |
| 5157  | PDGFRL  | 2.4825  | 0.0061152 |
| 2123  | EVI2A   | 2.3165  | 0.0063442 |
| 1290  | COL5A2  | 5.3795  | 0.0063571 |
| 5506  | PPP1R3A | -2.0413 | 0.0063831 |
| 4047  | LSS     | -2.8687 | 0.0064057 |
| 26240 | FAM50B  | -3.0986 | 0.0064858 |
| 10875 | FGL2    | 3.2132  | 0.0066696 |
| 7837  | PXDN    | 2.5818  | 0.0067371 |
| 9201  | DCLK1   | 3.7454  | 0.0067452 |
| 63891 | RNF123  | -3.2801 | 0.0067578 |
| 51673 | TPPP3   | 2.2846  | 0.0070627 |
| 5533  | PPP3CC  | -3.256  | 0.0072688 |
| 10094 | ARPC3   | 2.7821  | 0.0074239 |
| 6256  | RXRA    | -4.2753 | 0.0074584 |
| 2213  | FCGR2B  | 2.0216  | 0.0075397 |
| 9871  | SEC24D  | 2.6554  | 0.0075589 |

|       |          |         |           |
|-------|----------|---------|-----------|
| 1601  | DAB2     | 3.4824  | 0.0078367 |
| 1277  | COL1A1   | 4.9413  | 0.0078909 |
| 5334  | PLCL1    | -2.2181 | 0.0078951 |
| 57088 | PLSCR4   | 2.323   | 0.0079157 |
| 390   | RND3     | 2.2294  | 0.0079539 |
| 5042  | PABPC3   | 3.1528  | 0.0079643 |
| 9540  | TP53I3   | 3.7509  | 0.0079905 |
| 55852 | TEX2     | -2.4689 | 0.0079925 |
| 7058  | THBS2    | 3.0278  | 0.0080588 |
| 2000  | ELF4     | 2.1393  | 0.0081283 |
| 10462 | CLEC10A  | 2.2505  | 0.0082486 |
| 9061  | PAPSS1   | 2.5205  | 0.008306  |
| 5634  | PRPS2    | 2.2481  | 0.008319  |
| 829   | CAPZA1   | 2.8498  | 0.008319  |
| 1278  | COL1A2   | 5.3137  | 0.008632  |
| 1471  | CST3     | 2.8398  | 0.0088112 |
| 8533  | COPS3    | -2.8366 | 0.0088112 |
| 2782  | GNB1     | 2.1133  | 0.0089069 |
| 23564 | DDAH2    | 3.178   | 0.0089519 |
| 2191  | FAP      | 2.712   | 0.0089819 |
| 10961 | ERP29    | 2.2029  | 0.0091686 |
| 7867  | MAPKAPK3 | -2.022  | 0.0094857 |
| 8531  | YBX3     | -2.2832 | 0.0096056 |
| 23075 | SWAP70   | 2.1091  | 0.0098155 |
| 56829 | ZC3HAV1  | 2.603   | 0.0098937 |
| 5720  | PSME1    | 2.5699  | 0.0099957 |
| 4692  | NDN      | 2.9208  | 0.010038  |
| 11275 | KLHL2    | 2.2978  | 0.010107  |
| 51809 | GALNT7   | 2.9057  | 0.010163  |
| 58533 | SNX6     | 2.4264  | 0.010355  |
| 6640  | SNTA1    | -3.0982 | 0.010381  |

|       |          |         |          |
|-------|----------|---------|----------|
| 63941 | NECAB3   | -2.4137 | 0.010518 |
| 3052  | HCCS     | -2.2004 | 0.010551 |
| 1176  | AP3S1    | 2.875   | 0.010668 |
| 58513 | EPS15L1  | -2.3432 | 0.010799 |
| 65108 | MARCKSL1 | 2.0352  | 0.010809 |
| 4232  | MEST     | 3.8807  | 0.010885 |
| 22856 | CHSY1    | 2.9596  | 0.011014 |
| 5788  | PTPRC    | 2.518   | 0.011019 |
| 6218  | RPS17    | 2.0762  | 0.011032 |
| 81563 | C1orf21  | -2.4439 | 0.011048 |
| 6777  | STAT5B   | -2.3887 | 0.011052 |
| 79001 | VKORC1   | 2.4045  | 0.011198 |
| 29760 | BLNK     | 2.6675  | 0.011427 |
| 596   | BCL2     | -2.3317 | 0.011427 |
| 25822 | DNAJB5   | -2.4993 | 0.01165  |
| 5436  | POLR2G   | 2.1384  | 0.011692 |
| 2534  | FYN      | 3.4316  | 0.011717 |
| 3091  | HIF1A    | 3.4286  | 0.011953 |
| 55168 | MRPS18A  | -2.117  | 0.012076 |
| 5325  | PLAGL1   | 3.4584  | 0.012253 |
| 23654 | PLXNB2   | 3.0656  | 0.012335 |
| 55144 | LRRC8D   | 2.4138  | 0.012466 |
| 22795 | NID2     | 3.3565  | 0.012481 |
| 3059  | HCLS1    | 3.1818  | 0.012574 |
| 3134  | HLA-F    | 2.3437  | 0.012674 |
| 3107  | HLA-C    | 2.9617  | 0.012674 |
| 91977 | MYOZ3    | -2.1098 | 0.012833 |
| 834   | CASP1    | 2.9515  | 0.012925 |
| 32    | ACACB    | -2.4399 | 0.01308  |
| 7077  | TIMP2    | 3.0618  | 0.013087 |
| 64208 | POPDC3   | -2.5889 | 0.013093 |

|       |          |         |          |
|-------|----------|---------|----------|
| 10549 | PRDX4    | 2.7278  | 0.01315  |
| 6890  | TAP1     | 2.132   | 0.01315  |
| 10049 | DNAJB6   | -2.2446 | 0.01315  |
| 2874  | GPS2     | -2.7111 | 0.01315  |
| 29780 | PARVB    | -2.6452 | 0.013185 |
| 5791  | PTPRE    | 2.8592  | 0.013304 |
| 8266  | UBL4A    | -2.1644 | 0.013858 |
| 10749 | KIF1C    | -2.0587 | 0.013978 |
| 2824  | GPM6B    | 2.5762  | 0.014111 |
| 678   | ZFP36L2  | 2.0656  | 0.014138 |
| 1650  | DDOST    | 2.0793  | 0.014434 |
| 23194 | FBXL7    | 2.44    | 0.014543 |
| 51306 | FAM13B   | 2.4874  | 0.014609 |
| 54977 | SLC25A38 | -2.1257 | 0.014819 |
| 6717  | SRI      | 2.7511  | 0.014864 |
| 7373  | COL14A1  | 2.5478  | 0.014952 |
| 23423 | TMED3    | 3.2135  | 0.014972 |
| 10161 | LPAR6    | 2.5525  | 0.015028 |
| 3249  | HPN      | -2.8065 | 0.015107 |
| 1808  | DPYSL2   | 3.3249  | 0.015107 |
| 6135  | RPL11    | 2.314   | 0.015221 |
| 11034 | DSTN     | 2.2281  | 0.015221 |
| 199   | AIF1     | 2.5587  | 0.015221 |
| 2171  | FABP5    | 2.379   | 0.015297 |
| 694   | BTG1     | 2.7666  | 0.015332 |
| 2719  | GPC3     | 2.3184  | 0.015451 |
| 9670  | IPO13    | -2.3988 | 0.015699 |
| 55324 | ABCF3    | -2.4775 | 0.015785 |
| 55544 | RBM38    | -2.1264 | 0.016303 |
| 11075 | STMN2    | 2.0437  | 0.016372 |
| 79895 | ATP8B4   | 2.1556  | 0.016417 |

|        |         |         |          |
|--------|---------|---------|----------|
| 51     | ACOX1   | -2.1761 | 0.016575 |
| 6451   | SH3BGRL | 3.766   | 0.016577 |
| 5480   | PPIC    | 2.3715  | 0.016603 |
| 114908 | TMEM123 | 2.8478  | 0.016768 |
| 10920  | COPS8   | -2.4404 | 0.017027 |
| 1902   | LPAR1   | 2.5315  | 0.01726  |
| 4734   | NEDD4   | -2.0255 | 0.01726  |
| 7074   | TIAM1   | 2.5227  | 0.017433 |
| 81031  | SLC2A10 | 3.3148  | 0.017518 |
| 3956   | LGALS1  | 2.5031  | 0.017617 |
| 23136  | EPB41L3 | 4.5488  | 0.017648 |
| 1842   | ECM2    | 2.185   | 0.017698 |
| 10159  | ATP6AP2 | 3.1971  | 0.017777 |
| 23034  | SAMD4A  | -3.9955 | 0.017873 |
| 7803   | PTP4A1  | -2.2855 | 0.017987 |
| 9445   | ITM2B   | 2.845   | 0.018017 |
| 4088   | SMAD3   | -2.2511 | 0.018151 |
| 57061  | HYMAI   | 2.5476  | 0.018231 |
| 79971  | WLS     | 2.2881  | 0.018232 |
| 55619  | DOCK10  | 2.1723  | 0.018485 |
| 25820  | ARIH1   | -2.6703 | 0.018539 |
| 3087   | HHEX    | 2.027   | 0.018659 |
| 1281   | COL3A1  | 6.5666  | 0.018725 |
| 29803  | REPIN1  | -2.1089 | 0.018725 |
| 2697   | GJA1    | 2.521   | 0.018794 |
| 143    | PARP4   | 3.4142  | 0.018959 |
| 79894  | ZNF672  | -2.5838 | 0.018959 |
| 23598  | PATZ1   | -2.2894 | 0.019135 |
| 6575   | SLC20A2 | -2.1235 | 0.019148 |
| 115207 | KCTD12  | 3.5878  | 0.019148 |
| 27183  | VPS4A   | -2.5896 | 0.019156 |

|        |         |         |          |
|--------|---------|---------|----------|
| 6678   | SPARC   | 6.0422  | 0.019283 |
| 5567   | PRKACB  | 2.947   | 0.019568 |
| 10572  | SIVA1   | -2.4475 | 0.019568 |
| 3915   | LAMC1   | 2.7388  | 0.019722 |
| 2326   | FMO1    | 3.6579  | 0.019955 |
| 113    | ADCY7   | 3.555   | 0.019964 |
| 22887  | FOXJ3   | -2.5485 | 0.020028 |
| 5937   | RBMS1   | 2.3964  | 0.020157 |
| 91851  | CHRD1   | 2.9827  | 0.020186 |
| 23303  | KIF13B  | 2.3889  | 0.020323 |
| 5621   | PRNP    | 2.3574  | 0.0205   |
| 901    | CCNG2   | 2.6572  | 0.020587 |
| 196    | AHR     | 3.4963  | 0.020594 |
| 9640   | ZNF592  | -2.5209 | 0.020594 |
| 90865  | IL33    | 2.6148  | 0.020594 |
| 5696   | PSMB8   | 2.7855  | 0.020625 |
| 54477  | PLEKHA5 | 2.4285  | 0.021678 |
| 2314   | FLII    | -3.1826 | 0.022136 |
| 120    | ADD3    | 2.4724  | 0.022201 |
| 1805   | DPT     | 3.4611  | 0.022409 |
| 22884  | WDR37   | -2.3896 | 0.022457 |
| 1193   | CLIC2   | 2.0085  | 0.022836 |
| 90410  | IFT20   | 2.9062  | 0.02285  |
| 25825  | BACE2   | 2.0406  | 0.023031 |
| 6091   | ROBO1   | 3.1271  | 0.023271 |
| 389136 | VGLL3   | 2.8179  | 0.023794 |
| 26099  | SZRD1   | -2.0745 | 0.023885 |
| 79161  | TMEM243 | 2.3768  | 0.023927 |
| 4969   | OGN     | 3.183   | 0.023958 |
| 23125  | CAMTA2  | -2.1269 | 0.024078 |
| 963    | CD53    | 2.3913  | 0.024156 |

|       |         |         |          |
|-------|---------|---------|----------|
| 378   | ARF4    | 2.5627  | 0.024224 |
| 4082  | MARCKS  | 3.5828  | 0.024297 |
| 4286  | MITF    | -2.7343 | 0.024495 |
| 6535  | SLC6A8  | -2.2909 | 0.025268 |
| 7089  | TLE2    | -3.0697 | 0.025404 |
| 6390  | SDHB    | -2.0897 | 0.025447 |
| 54583 | EGLN1   | -2.6569 | 0.025652 |
| 5836  | PYGL    | 2.747   | 0.025713 |
| 27230 | SERP1   | 2.6294  | 0.025795 |
| 9513  | FXR2    | -2.6633 | 0.025878 |
| 1647  | GADD45A | 3.2174  | 0.025978 |
| 4928  | NUP98   | -2.1553 | 0.026142 |
| 7059  | THBS3   | 2.4844  | 0.026353 |
| 1282  | COL4A1  | 2.2447  | 0.026521 |
| 1289  | COL5A1  | 5.1677  | 0.026688 |
| 1519  | CTSO    | 2.1984  | 0.026777 |
| 5908  | RAP1B   | 2.8308  | 0.026818 |
| 28996 | HIPK2   | -2.2825 | 0.026827 |
| 5833  | PCYT2   | -2.14   | 0.026933 |
| 55608 | ANKRD10 | 2.3501  | 0.026933 |
| 57380 | MRS2    | -2.1335 | 0.027004 |
| 8910  | SGCE    | 2.8986  | 0.027083 |
| 6746  | SSR2    | 2.836   | 0.027257 |
| 55076 | TMEM45A | 2.8312  | 0.027347 |
| 1513  | CTSK    | 3.7257  | 0.027624 |
| 7764  | ZNF217  | 3.1986  | 0.027826 |
| 23062 | GGA2    | -2.0846 | 0.027831 |
| 6745  | SSR1    | 3.6159  | 0.028104 |
| 9839  | ZEB2    | 3.2294  | 0.028104 |
| 4004  | LMO1    | -2.0087 | 0.028104 |
| 11177 | BAZ1A   | 2.0238  | 0.028104 |

|        |         |         |          |
|--------|---------|---------|----------|
| 7106   | TSPAN4  | 2.6345  | 0.028241 |
| 5168   | ENPP2   | 2.7326  | 0.028469 |
| 2764   | GMFB    | 2.2434  | 0.028495 |
| 9780   | PIEZO1  | 2.6139  | 0.028664 |
| 79784  | MYH14   | -2.942  | 0.028664 |
| 57415  | C3orf14 | 2.1836  | 0.028664 |
| 1612   | DAPK1   | 2.285   | 0.028711 |
| 491    | ATP2B2  | -2.7131 | 0.029271 |
| 11155  | LDB3    | -2.186  | 0.029381 |
| 51280  | GOLM1   | 2.6309  | 0.029916 |
| 5536   | PPP5C   | -2.0383 | 0.030135 |
| 8165   | AKAP1   | -2.0127 | 0.030192 |
| 2195   | FAT1    | 3.6334  | 0.030198 |
| 51279  | C1RL    | 2.3362  | 0.03028  |
| 283298 | OLFML1  | 2.6368  | 0.030337 |
| 10178  | TENM1   | 2.8699  | 0.030417 |
| 10950  | BTG3    | 2.7759  | 0.030763 |
| 2173   | FABP7   | -2.024  | 0.030837 |
| 23179  | RGL1    | 2.4294  | 0.030896 |
| 3479   | IGF1    | 2.1137  | 0.03093  |
| 2288   | FKBP4   | -2.7777 | 0.031447 |
| 55905  | RNF114  | -2.3379 | 0.031922 |
| 51196  | PLCE1   | 2.0072  | 0.031922 |
| 2029   | ENSA    | -2.0736 | 0.032178 |
| 6899   | TBX1    | -2.6115 | 0.032197 |
| 1845   | DUSP3   | -2.6056 | 0.032397 |
| 1580   | CYP4B1  | -2.3667 | 0.032497 |
| 91754  | NEK9    | -2.2596 | 0.032639 |
| 1495   | CTNNA1  | 2.1812  | 0.03283  |
| 4122   | MAN2A2  | -3.1299 | 0.03283  |
| 2065   | ERBB3   | 3.1583  | 0.032861 |



|       |          |         |          |
|-------|----------|---------|----------|
| 327   | APEH     | -2.2282 | 0.032911 |
| 6934  | TCF7L2   | 2.657   | 0.032911 |
| 55665 | URGCP    | -2.0188 | 0.032911 |
| 2037  | EPB41L2  | 2.0067  | 0.03306  |
| 11047 | ADRM1    | -2.4425 | 0.033146 |
| 2992  | GYG1     | -2.6982 | 0.03324  |
| 7306  | TYRP1    | -3.827  | 0.033266 |
| 6201  | RPS7     | 2.8438  | 0.033706 |
| 56288 | PARD3    | -2.0209 | 0.033745 |
| 55778 | ZNF839   | -2.3357 | 0.03378  |
| 11015 | KDELR3   | 2.2118  | 0.03402  |
| 9261  | MAPKAPK2 | -2.1385 | 0.03412  |
| 23522 | KAT6B    | -2.0161 | 0.034349 |
| 22877 | MLXIP    | -3.6795 | 0.034611 |
| 7866  | IFRD2    | -2.1945 | 0.034611 |
| 5442  | POLRMT   | -2.7653 | 0.035043 |
| 10769 | PLK2     | 3.1052  | 0.035072 |
| 2004  | ELK3     | 2.8837  | 0.035227 |
| 56271 | BEX4     | 3.1834  | 0.035785 |
| 8228  | PNPLA4   | -2.4546 | 0.035844 |
| 9321  | TRIP11   | -2.0463 | 0.035844 |
| 23150 | FRMD4B   | 2.6165  | 0.035872 |
| 51207 | DUSP13   | -2.1004 | 0.035923 |
| 8694  | DGAT1    | -2.0423 | 0.036048 |
| 55652 | SLC48A1  | -3.1676 | 0.036085 |
| 83468 | GLT8D2   | 2.7507  | 0.03617  |
| 65018 | PINK1    | -2.1375 | 0.036586 |
| 9825  | SPATA2   | -2.4678 | 0.036752 |
| 26064 | RAI14    | 2.8019  | 0.036975 |
| 8560  | DEGS1    | 2.4099  | 0.037452 |
| 9770  | RASSF2   | 3.1159  | 0.037909 |

|        |          |         |          |
|--------|----------|---------|----------|
| 6133   | RPL9     | 2.6798  | 0.038122 |
| 9902   | MRC2     | 2.2785  | 0.038246 |
| 5178   | PEG3     | 2.427   | 0.038262 |
| 440738 | MAP1LC3C | 2.0164  | 0.038392 |
| 10603  | SH2B2    | -2.4179 | 0.038575 |
| 11066  | SNRNP35  | -2.1109 | 0.038939 |
| 3297   | HSF1     | -2.3178 | 0.039351 |
| 55830  | GLT8D1   | 2.7192  | 0.039446 |
| 4842   | NOS1     | -2.1529 | 0.039463 |
| 51339  | DACT1    | 2.0473  | 0.039496 |
| 857    | CAV1     | 2.3776  | 0.039632 |
| 79805  | VASH2    | 2.4494  | 0.039632 |
| 51728  | POLR3K   | -2.0647 | 0.039646 |
| 114327 | EFHC1    | 2.8296  | 0.039745 |
| 10659  | CELF2    | 3.5995  | 0.039802 |
| 81558  | FAM117A  | 2.0179  | 0.039844 |
| 3778   | KCNMA1   | -2.0581 | 0.039934 |
| 2205   | FCER1A   | 2.2816  | 0.04053  |
| 55662  | HIF1AN   | -2.1985 | 0.040591 |
| 10444  | ZER1     | -2.7538 | 0.040882 |
| 2289   | FKBP5    | -2.2827 | 0.040923 |
| 6944   | VPS72    | -2.5145 | 0.040954 |
| 4015   | LOX      | 3.0076  | 0.040985 |
| 3069   | HDLBP    | -2.4614 | 0.041121 |
| 5116   | PCNT     | -2.1313 | 0.041382 |
| 27129  | HSPB7    | -2.0946 | 0.041719 |
| 1306   | COL15A1  | 3.6405  | 0.041809 |
| 9217   | VAPB     | -2.4016 | 0.042321 |
| 1837   | DTNA     | -2.2148 | 0.042321 |
| 5830   | PEX5     | -2.1126 | 0.042367 |
| 54453  | RIN2     | 2.2312  | 0.042963 |

|        |          |         |          |
|--------|----------|---------|----------|
| 10857  | PGRMC1   | 2.785   | 0.043807 |
| 5348   | FXD1     | -2.0172 | 0.043936 |
| 57162  | PELI1    | 2.6643  | 0.044759 |
| 10456  | HAX1     | -2.2893 | 0.044947 |
| 2873   | GPS1     | -2.3732 | 0.045107 |
| 637    | BID      | 2.0762  | 0.04548  |
| 23014  | FBXO21   | -2.7647 | 0.046187 |
| 51526  | OSER1    | -2.9929 | 0.046503 |
| 55326  | AGPAT5   | 2.0569  | 0.046503 |
| 50856  | CLEC4A   | 2.0143  | 0.046513 |
| 23023  | TMCC1    | -2.8478 | 0.046535 |
| 9148   | NEURL1   | -2.2483 | 0.046747 |
| 10493  | VAT1     | 2.0922  | 0.047146 |
| 145389 | SLC38A6  | 2.0411  | 0.047288 |
| 23270  | TSPYL4   | 2.1227  | 0.047442 |
| 22921  | MSRB2    | -2.6197 | 0.04764  |
| 5048   | PAFAH1B1 | -2.1163 | 0.04788  |
| 256987 | SERINC5  | 2.7153  | 0.048186 |
| 64960  | MRPS15   | -2.1047 | 0.048394 |
| 2101   | ESRRA    | -2.5375 | 0.049125 |
| 10971  | YWHAQ    | 3.6866  | 0.049202 |
| 3912   | LAMB1    | 3.684   | 0.049461 |
| 23312  | DMXL2    | 2.7138  | 0.049461 |
| 51170  | HSD17B11 | 2.6385  | 0.049574 |
| 28999  | KLF15    | -2.3231 | 0.049898 |

**Suppl. Table 2.** List of genes belonging to the DMD signature network.

| Name            | Combin<br>ed ES | Adj.<br>Pval | Biological Process (GO)                                                                                                                                                                                                                      |
|-----------------|-----------------|--------------|----------------------------------------------------------------------------------------------------------------------------------------------------------------------------------------------------------------------------------------------|
| <i>HLA-DPB1</i> | 2.8816          | 0            | GO:0032729 positive regulation of interferon-gamma production;GO:0060333 interferon-gamma-mediated signaling pathway;GO:0019886 antigen processing and presentation of exogenous peptide antigen via MHC class II                            |
| <i>VAMP8</i>    | 2.9953          | 0            | GO:1903595 positive regulation of histamine secretion by mast cell;GO:0016240 autophagosome membrane docking;GO:0002278 eosinophil activation involved in immune response                                                                    |
| <i>MAGED2</i>   | 3.0779          | 0            | GO:0070294 renal sodium ion absorption;GO:0003096 renal sodium ion transport;GO:0070293 renal absorption                                                                                                                                     |
| <i>HLA-DPA1</i> | 2.9842          | 0            | GO:0032729 positive regulation of interferon-gamma production;GO:0060333 interferon-gamma-mediated signaling pathway;GO:0019886 antigen processing and presentation of exogenous peptide antigen via MHC class II                            |
| <i>FTL</i>      | 3.3021          | 0            | GO:0006880 intracellular sequestering of iron ion;GO:0097577 sequestering of iron ion;GO:0051238 sequestering of metal ion                                                                                                                   |
| <i>A2M</i>      | 2.4783          | 2.06E-13     | GO:0001868 regulation of complement activation, lectin pathway;GO:0001869 negative regulation of complement activation, lectin pathway;GO:0045916 negative regulation of complement activation                                               |
| <i>FSTL1</i>    | 2.3913          | 7.54E-13     | GO:0061484 hematopoietic stem cell homeostasis;GO:0030510 regulation of BMP signaling pathway;GO:0045446 endothelial cell differentiation                                                                                                    |
| <i>ITGB2</i>    | 2.3645          | 8.33E-13     | GO:0045914 negative regulation of catecholamine metabolic process;GO:0045963 negative regulation of dopamine metabolic process;GO:2000361 regulation of prostaglandin-E synthase activity                                                    |
| <i>ADAM10</i>   | 2.2241          | 6.60E-12     | GO:0051089 constitutive protein ectodomain proteolysis;GO:0035333 Notch receptor processing, ligand-dependent;GO:0098696 regulation of neurotransmitter receptor localization to postsynaptic specialization membrane                        |
| <i>AXL</i>      | 2.1538          | 1.92E-11     | GO:0097350 neutrophil clearance;GO:0032825 positive regulation of natural killer cell differentiation;GO:0048549 positive regulation of pinocytosis                                                                                          |
| <i>HLA-DQB1</i> | 2.1338          | 2.77E-11     | GO:0002381 immunoglobulin production involved in immunoglobulin mediated immune response;GO:0060333 interferon-gamma-mediated signaling pathway;GO:0019886 antigen processing and presentation of exogenous peptide antigen via MHC class II |
| <i>SRGN</i>     | 2.0239          | 1.16E-10     | GO:0033371 T cell secretory granule organization;GO:0033367 protein localization to mast cell secretory granule;GO:0033368 protease localization to mast cell secretory granule                                                              |
| <i>CSF1R</i>    | 3.5282          | 1.06E-09     | GO:0038145 macrophage colony-stimulating factor signaling pathway;GO:0120041 positive regulation of macrophage proliferation;GO:0120040 regulation of macrophage proliferation                                                               |
| <i>CD74</i>     | 3.1564          | 5.66E-09     | GO:2000448 positive regulation of macrophage migration inhibitory factor signaling pathway;GO:0002901 mature B cell apoptotic process;GO:0002905 regulation of mature B cell apoptotic process                                               |
| <i>TYROBP</i>   | 4.0016          | 2.33E-08     | GO:0110090 positive regulation of hippocampal neuron apoptotic process;GO:0002222 stimulatory killer cell immunoglobulin-like receptor signaling pathway;GO:0090634 microglial cell mediated cytotoxicity                                    |
| <i>HLA-DRA</i>  | 3.9545          | 3.13E-08     | GO:0002491 antigen processing and presentation of endogenous peptide antigen via MHC class II;GO:0002469 myeloid dendritic cell antigen processing and presentation;GO:0002399 MHC class II protein complex assembly                         |
| <i>IGFBP4</i>   | 2.0655          | 4.41E-08     | GO:0043568 positive regulation of insulin-like growth factor receptor signaling pathway;GO:0044342 type B pancreatic cell proliferation;GO:0043567 regulation of insulin-like growth factor receptor signaling pathway                       |
| <i>TRIP10</i>   | -2.8064         | 1.31E-07     | GO:0051056 regulation of small GTPase mediated signal transduction;GO:0007264 small GTPase mediated signal transduction;GO:0030036 actin cytoskeleton organization                                                                           |
| <i>MXRA8</i>    | 2.2948          | 4.82E-07     | GO:0060857 establishment of glial blood-brain barrier;GO:0060856 establishment of blood-brain barrier;GO:0021782 glial cell development                                                                                                      |
| <i>SERPIN1</i>  | 3.1772          | 3.32E-06     | GO:0001868 regulation of complement activation, lectin pathway;GO:0001869 negative regulation of complement activation, lectin pathway;GO:0045916 negative regulation of complement activation                                               |
| <i>CYFIP1</i>   | 2.5736          | 8.01E-06     | GO:0099578 regulation of translation at postsynapse, modulating synaptic transmission;GO:0140245 regulation of translation at postsynapse;GO:1903422 negative regulation of synaptic vesicle recycling                                       |
| <i>NECAP2</i>   | 2.0162          | 1.22E-05     | GO:0006897 endocytosis;GO:0098657 import into cell;GO:0015031 protein transport                                                                                                                                                              |
| <i>F13A1</i>    | 2.4647          | 1.80E-05     | GO:0072378 blood coagulation, fibrin clot formation;GO:0018149 peptide cross-linking;GO:0002576 platelet degranulation                                                                                                                       |
| <i>ANXA5</i>    | 3.4738          | 2.98E-05     | GO:0050819 negative regulation of coagulation;GO:0050818 regulation of coagulation;GO:0002576 platelet degranulation                                                                                                                         |
| <i>ARPC1B</i>   | 2.8596          | 3.24E-05     | GO:0034314 Arp2/3 complex-mediated actin nucleation;GO:0045010 actin nucleation;GO:0043627 response to estrogen                                                                                                                              |
| <i>IQGAP1</i>   | 2.0718          | 0.000112     | GO:1900086 positive regulation of peptidyl-tyrosine autophosphorylation;GO:1900084 regulation of peptidyl-tyrosine autophosphorylation;GO:0072015 glomerular visceral epithelial cell development                                            |
| <i>PROS1</i>    | 3.5387          | 0.00018      | GO:0042730 fibrinolysis;GO:0030195 negative regulation of blood coagulation;GO:1900047 negative                                                                                                                                              |

|                |         |              |                                                                                                                                                                                                                               |
|----------------|---------|--------------|-------------------------------------------------------------------------------------------------------------------------------------------------------------------------------------------------------------------------------|
|                |         | 5            | regulation of hemostasis                                                                                                                                                                                                      |
| <i>CD44</i>    | 4.0790  | 0.00037<br>6 | GO:1900623 regulation of monocyte aggregation;GO:1900625 positive regulation of monocyte aggregation;GO:0070487 monocyte aggregation                                                                                          |
| <i>FBN1</i>    | 2.5827  | 0.00049<br>5 | GO:0035582 sequestering of BMP in extracellular matrix;GO:0035583 sequestering of TGFbeta in extracellular matrix;GO:0048050 post-embryonic eye morphogenesis                                                                 |
| <i>C3</i>      | 3.5092  | 0.00073<br>1 | GO:0001798 positive regulation of type IIa hypersensitivity;GO:0002894 positive regulation of type II hypersensitivity;GO:0001970 positive regulation of activation of membrane attack complex                                |
| <i>CNKSRI</i>  | -2.0712 | 0.00080<br>5 | GO:0007266 Rho protein signal transduction;GO:0007265 Ras protein signal transduction;GO:0007264 small GTPase mediated signal transduction                                                                                    |
| <i>WIPF1</i>   | 3.0692  | 0.00092<br>1 | GO:0002433 immune response-regulating cell surface receptor signaling pathway involved in phagocytosis;GO:0038096 Fc-gamma receptor signaling pathway involved in phagocytosis;GO:0038094 Fc-gamma receptor signaling pathway |
| <i>IGFBP7</i>  | 2.9953  | 0.00093<br>5 | GO:0051414 response to cortisol;GO:0007566 embryo implantation;GO:0050810 regulation of steroid biosynthetic process                                                                                                          |
| <i>CXCL12</i>  | 3.9028  | 0.00103<br>2 | GO:1990478 response to ultrasound;GO:1903237 negative regulation of leukocyte tethering or rolling;GO:0038146 chemokine (C-X-C motif) ligand 12 signaling pathway                                                             |
| <i>IL10RA</i>  | 2.7956  | 0.00108<br>9 | GO:0070086 ubiquitin-dependent endocytosis;GO:0010507 negative regulation of autophagy;GO:0046427 positive regulation of JAK-STAT cascade                                                                                     |
| <i>ARPC5</i>   | 3.2685  | 0.00135<br>6 | GO:0021769 orbitofrontal cortex development;GO:0051639 actin filament network formation;GO:0030011 maintenance of cell polarity                                                                                               |
| <i>FCER1G</i>  | 2.4557  | 0.00144<br>3 | GO:0038156 interleukin-3-mediated signaling pathway;GO:0071404 cellular response to low-density lipoprotein particle stimulus;GO:0032753 positive regulation of interleukin-4 production                                      |
| <i>PTEN</i>    | 2.0610  | 0.00146<br>1 | GO:2000808 negative regulation of synaptic vesicle clustering;GO:0051548 negative regulation of keratinocyte migration;GO:1903984 positive regulation of TRAIL-activated apoptotic signaling pathway                          |
| <i>FCGR2A</i>  | 2.2393  | 0.00150<br>2 | GO:0002433 immune response-regulating cell surface receptor signaling pathway involved in phagocytosis;GO:0038096 Fc-gamma receptor signaling pathway involved in phagocytosis;GO:0038094 Fc-gamma receptor signaling pathway |
| <i>LYN</i>     | 2.4569  | 0.00171<br>7 | GO:0070668 positive regulation of mast cell proliferation;GO:0070667 negative regulation of mast cell proliferation;GO:0070447 positive regulation of oligodendrocyte progenitor proliferation                                |
| <i>PENK</i>    | 2.89    | 0.00236<br>1 | GO:0051867 general adaptation syndrome, behavioral process;GO:0099538 synaptic signaling via neuropeptide;GO:0051866 general adaptation syndrome                                                                              |
| <i>SDC2</i>    | 2.2067  | 0.00293<br>5 | GO:0006027 glycosaminoglycan catabolic process;GO:0006026 aminoglycan catabolic process;GO:0048013 ephrin receptor signaling pathway                                                                                          |
| <i>GNAI3</i>   | 2.5202  | 0.00324<br>2 | GO:0033864 positive regulation of NAD(P)H oxidase activity;GO:0033860 regulation of NAD(P)H oxidase activity;GO:0032930 positive regulation of superoxide anion generation                                                    |
| <i>ITGAM</i>   | 2.5580  | 0.00542<br>1 | GO:0045914 negative regulation of catecholamine metabolic process;GO:0045963 negative regulation of dopamine metabolic process;GO:0110090 positive regulation of hippocampal neuron apoptotic process                         |
| <i>ISLR</i>    | 2.5491  | 0.00544<br>8 | GO:0002576 platelet degranulation;GO:0045055 regulated exocytosis;GO:0006887 exocytosis                                                                                                                                       |
| <i>CHRNA1</i>  | 4.2218  | 0.00568<br>7 | GO:0048630 skeletal muscle tissue growth;GO:0046716 muscle cell cellular homeostasis;GO:0007274 neuromuscular synaptic transmission                                                                                           |
| <i>CRKL</i>    | -2.1813 | 0.0058       | GO:0035685 helper T cell diapedesis;GO:0035684 helper T cell extravasation;GO:0098749 cerebellar neuron development                                                                                                           |
| <i>ARPC3</i>   | 2.7821  | 0.00742<br>4 | GO:0070358 actin polymerization-dependent cell motility;GO:0034314 Arp2/3 complex-mediated actin nucleation;GO:1990090 cellular response to nerve growth factor stimulus                                                      |
| <i>FCGR2B</i>  | 2.0216  | 0.00754      | GO:0001811 negative regulation of type I hypersensitivity;GO:0001797 negative regulation of type IIa hypersensitivity;GO:0001814 negative regulation of antibody-dependent cellular cytotoxicity                              |
| <i>DAB2</i>    | 3.4824  | 0.00783<br>7 | GO:0035026 leading edge cell differentiation;GO:2000370 positive regulation of clathrin-dependent endocytosis;GO:2000643 positive regulation of early endosome to late endosome transport                                     |
| <i>PAPSS1</i>  | 2.5205  | 0.00830<br>6 | GO:0000103 sulfate assimilation;GO:0034036 purine ribonucleoside bisphosphate biosynthetic process;GO:0050428 3'-phosphoadenosine 5'-phosphosulfate biosynthetic process                                                      |
| <i>CST3</i>    | 2.8398  | 0.00881<br>1 | GO:0010711 negative regulation of collagen catabolic process;GO:0060311 negative regulation of elastin catabolic process;GO:0060313 negative regulation of blood vessel remodeling                                            |
| <i>ZC3HAV1</i> | 2.6030  | 0.00989<br>4 | GO:0070212 protein poly-ADP-ribosylation;GO:0006471 protein ADP-ribosylation;GO:0061014 positive regulation of mRNA catabolic process                                                                                         |
| <i>AP3S1</i>   | 2.8750  | 0.01066<br>8 | GO:0048490 anterograde synaptic vesicle transport;GO:0099514 synaptic vesicle cytoskeletal transport;GO:0099517 synaptic vesicle transport along microtubule                                                                  |
| <i>EPS15L1</i> | -2.3432 | 0.01079<br>9 | GO:0042059 negative regulation of epidermal growth factor receptor signaling pathway;GO:1901185 negative regulation of ERBB signaling pathway;GO:0042058 regulation of epidermal growth factor receptor signaling pathway     |
| <i>PTPRC</i>   | 2.5180  | 0.01101<br>9 | GO:1904155 DN2 thymocyte differentiation;GO:0044855 plasma membrane raft distribution;GO:0044856 plasma membrane raft localization                                                                                            |
| <i>STAT5B</i>  | -2.3887 | 0.01105      | GO:0046544 development of secondary male sexual characteristics;GO:0046543 development of                                                                                                                                     |

|                    |        |               |                                                                                                                                                                                                                                                                          |
|--------------------|--------|---------------|--------------------------------------------------------------------------------------------------------------------------------------------------------------------------------------------------------------------------------------------------------------------------|
|                    |        | 2             | secondary female sexual characteristics;GO:0032825 positive regulation of natural killer cell differentiation                                                                                                                                                            |
| <i>BLNK</i>        | 2.6675 | 0.01142<br>7  | GO:0050853 B cell receptor signaling pathway;GO:0030183 B cell differentiation;GO:0050851 antigen receptor-mediated signaling pathway                                                                                                                                    |
| <i>FYN</i>         | 3.4316 | 0.01171<br>7  | GO:0000304 response to singlet oxygen;GO:1905430 cellular response to glycine;GO:1905429 response to glycine                                                                                                                                                             |
| <i>GPC3</i>        | 2.3184 | 0.01545<br>1  | GO:0072138 mesenchymal cell proliferation involved in ureteric bud development;GO:0072180 mesonephric duct morphogenesis;GO:0061209 cell proliferation involved in mesonephros development                                                                               |
| <i>TIAM1</i>       | 2.5227 | 0.01743<br>3  | GO:1904266 regulation of Schwann cell chemotaxis;GO:1904268 positive regulation of Schwann cell chemotaxis;GO:1990751 Schwann cell chemotaxis                                                                                                                            |
| <i>SPARC</i>       | 6.0422 | 0.,0192<br>83 | GO:0033591 response to L-ascorbic acid;GO:0009629 response to gravity;GO:0010288 response to lead ion                                                                                                                                                                    |
| <i>PRKAC<br/>B</i> | 2.9470 | 0.01956<br>8  | GO:0097338 response to clozapine;GO:0097332 response to antipsychotic drug;GO:1901621 negative regulation of smoothed signaling pathway involved in dorsal/ventral neural tube patterning                                                                                |
| <i>LAMC1</i>       | 2.7388 | 0.01972<br>2  | GO:0031581 hemidesmosome assembly;GO:0035633 maintenance of permeability of blood-brain barrier;GO:0007492 endoderm development                                                                                                                                          |
| <i>CHRD1</i>       | 2.9827 | 0.02018<br>6  | GO:0030514 negative regulation of BMP signaling pathway;GO:0030510 regulation of BMP signaling pathway;GO:0090101 negative regulation of transmembrane receptor protein serine/threonine kinase signaling pathway                                                        |
| <i>RAP1B</i>       | 2.8308 | 0.02681<br>8  | GO:2000301 negative regulation of synaptic vesicle exocytosis;GO:1902804 negative regulation of synaptic vesicle transport;GO:0097211 cellular response to gonadotropin-releasing hormone                                                                                |
| <i>GOLM1</i>       | 2.6309 | 0.02991<br>6  | GO:0006997 nucleus organization;GO:0043687 post-translational protein modification;GO:0019216 regulation of lipid metabolic process                                                                                                                                      |
| <i>CTNNA1</i>      | 2.1812 | 0.03283       | GO:2001045 negative regulation of integrin-mediated signaling pathway;GO:0071680 response to indole-3-methanol;GO:0071681 cellular response to indole-3-methanol                                                                                                         |
| <i>ERBB3</i>       | 3.1583 | 0.03286<br>1  | GO:0070886 positive regulation of calcineurin-NFAT signaling cascade;GO:0106058 positive regulation of calcineurin-mediated signaling;GO:0070884 regulation of calcineurin-NFAT signaling cascade                                                                        |
| <i>CAV1</i>        | 2.3776 | 0.03963<br>2  | GO:1900085 negative regulation of peptidyl-tyrosine autophosphorylation;GO:0038016 insulin receptor internalization;GO:0033484 nitric oxide homeostasis                                                                                                                  |
| <i>FCER1A</i>      | 2.2816 | 0.04053       | GO:0038095 Fc-epsilon receptor signaling pathway;GO:0038093 Fc receptor signaling pathway;GO:0002768 immune response-regulating cell surface receptor signaling pathway                                                                                                  |
| <i>LAMB1</i>       | 3.6840 | 0.04946<br>1  | GO:0021812 neuronal-glia interaction involved in cerebral cortex radial glia guided migration;GO:0070831 basement membrane assembly;GO:0021801 cerebral cortex radial glia guided migration                                                                              |
| <i>SPP1</i>        | 2.6665 | 0.00223<br>4  | GO:0048673 collateral sprouting of intact axon in response to injury;GO:0048683 regulation of collateral sprouting of intact axon in response to injury;GO:0048685 negative regulation of collateral sprouting of intact axon in response to injury                      |
| <i>IGF1</i>        | 2.1137 | 0.03093       | GO:1904073 regulation of trophectodermal cell proliferation;GO:1904075 positive regulation of trophectodermal cell proliferation;GO:0009441 glycolate metabolic process                                                                                                  |
| <i>FN1</i>         | 2.1226 | 0.00311       | GO:1904235 regulation of substrate-dependent cell migration, cell attachment to substrate;GO:1904237 positive regulation of substrate-dependent cell migration, cell attachment to substrate;GO:0006931 substrate-dependent cell migration, cell attachment to substrate |
| <i>TIMP1</i>       | 3.5344 | 0.00000<br>3  | GO:0002248 connective tissue replacement involved in inflammatory response wound healing;GO:0002246 wound healing involved in inflammatory response;GO:1901164 negative regulation of trophoblast cell migration                                                         |
| <i>MMP2</i>        | 3.3968 | 0.00425<br>5  | GO:0001957 intramembranous ossification;GO:0036072 direct ossification;GO:0001955 blood vessel maturation                                                                                                                                                                |
